# Supplementary material for: A historical legacy of antibiotic utilization on bacterial seed banks in sediments
Source: PeerJ. 2018 Jan 3;6:e4197. doi: 10.7717/peerj.4197 (PMC5756452; doi:10.7717/peerj.4197)
Supplement: Supplemental Information 2 [file peerj-06-4197-s005.xlsx]

## Sheet: GeC1_metadat
nb	sample_name	depth_cm	year	DNA_gSed	spo0A_cp_ng	spo0A_cp_gSed	tetW_cp_ng	tetW_cp_gSed	sul1_cp_ng	sul1_cp_gSed
1	GeC1_01	1	2010	23.9333	1129.67	27036.8	40.5272	969.951	83.4788	1997.93
2	GeC1_02	3	2007	32.1333	432.713	13904.5	31.0802	998.711	82.5428	2652.37
3	GeC1_03	5	2005	17.6667	5112.07	90313.3	97.9393	1730.26	148.074	2615.97
4	GeC1_04	7	2002	15.3103	5828.7	89239.3	66.7263	1021.6	42.8642	656.266
6	GeC1_06	11	1997	17.4	2317.17	40318.8	82.8883	1442.26	64.2566	1118.06
7	GeC1_07	13	1994	27.4667	4076.49	111968	111.619	3065.81	19.2094	527.619
10	GeC1_10	19	1986	6.66667	14841	98940.2	138.162	921.081	73.6882	491.255
14	GeC1_14	27	1976	8.13333	82725.7	672836	519.837	4228.01	48.6403	395.608
15	GeC1_15	29	1973	11.2143	564.437	89823.3	18.0241	1923.89	15.7717	232.869
16	GeC1_16	31	1970	11.4667	40266.5	461722	312.924	3588.19	15.5658	178.488
18	GeC1_18	35	1965	14.7826	40740.2	602246	222.465	3288.61	9.92344	146.694
19	GeC1_19	37	1963	10.9655	10084.3	110579	179.998	1973.78	10.6344	116.612
20	GeC1_20	39	1961	10.2	4422.58	45110.3	41.4902	423.2	17.5594	179.106
21	GeC1_21	41	1959	8.57143	2971.1	25466.6	0	0	16.1234	138.201
22	GeC1_22	43	1957	9.2	3378.91	31086	14.1184	129.889	0	0
24	GeC1_24	47	1955	7.33333	2373.36	17404.7	15.9186	116.736	14.1483	103.754
26	GeC1_26	51	1953	27.5294	678.765	18686	17.3641	478.024	3.37091	92.7993
27	GeC1_27	53	1952	12.6	0	0	10.2049	128.582	5.43943	68.5368
28	GeC1_28	55	1950	12.0667	0	0	25.7765	311.037	19.8417	239.424
30	GeC1_30	59	1948	10.1333	677.448	6864.8	14.7182	149.144	11.0476	111.949
32	GeC1_32	63	1945	11.8667	461.559	5477.17	0	0	20.9578	248.699
34	GeC1_34	67	1943	6.66667	0	0	17.4907	116.605	22.997	153.313
35	GeC1_35	69	1942	6.2	12882.8	79873.6	25.3888	157.411	8.01622	49.7006
36	GeC1_36	71	1941	11.6296	4604.8	53552.2	0	0	13.2511	154.106
38	GeC1_38	75	1938	4.86667	6612.69	32181.8	27.3269	132.991	27.6263	134.448
40	GeC1_40	79	1936	8.73333	8009.72	4929.42	171.557	157.411	20.7654	137.74
42	GeC1_42	83	1933	4.8	2423.38	11632.2	37.7826	181.356	0	0
44	GeC1_44	87	1931	8.53333	0	0	64.6568	551.738	10.9236	93.2145
46	GeC1_46	91	1929	5.33333	1980.46	10562.4	32.002	170.678	36.9939	197.301
48	GeC1_48	95	1926	6.06667	849.111	5151.27	23.4508	142.268	39.4654	239.424
50	GeC1_50	99	1924	8.93333	1740.93	15552.3	11.5999	103.626	18.2003	162.589
52	GeC1_52	103	1921	6.73333	1235.65	8320.03	14.3864	96.8687	11.8229	79.6073
		depth of the core in cm	After dating, the core depth corresponds to a year	Extracted spore DNA from the sediment core, expressed here as ng of DNA per gram of sediment	Quantification of endospores using the marker spo0A. For the quantification, qPCRs were performed in triplicate and the mean value was used to calculate counts of spo0A per ng of extracted DNA.	Quantification of endospores using the marker spo0A. For the quantification, qPCRs were performed in triplicate and the mean value was used to calculate counts of spo0A per gram of sediment	Quantification of tet(W). For the quantification, qPCRs were performed in triplicate and the mean value was used to calculate counts of tet(W) per ng of extracted DNA.	Quantification of tet(W). For the quantification, qPCRs were performed in triplicate and the mean value was used to calculate counts of tet(W) per gram of sediment	Quantification of sul1. For the quantification, qPCRs were performed in triplicate and the mean value was used to calculate counts of sul1 per ng of extracted DNA.	Quantification of sul1. For the quantification, qPCRs were performed in triplicate and the mean value was used to calculate counts of sul1 per gram of sediment

## Sheet: total DNA
nb	sample_name	depth_cm	year	DNA_gSed	tetW_cp_ng	tetW_cp_gSed	sul1_cp_ng	sul1_cp_gSed
2	GeC1-2	3	2007	11760	4.47594	52637	48.6	571536
3	GeC1-3	5	2005	16400	6.35705	104256	61.1667	1.00313e+06
5	GeC1-5	9	2000	9840	5.38834	53021.3	38.0833	374740
7	GeC1-7	13	1994	10080	6.78918	68434.9	12.5	126000
11	GeC1-11	21	1984	9680	9.16778	88744.1	11.9833	115999
13	GeC1-13	25	1979	9360	7.27819	68123.9	10.95	102492
15	GeC1-15	29	1973	7328	17.0424	124887	5.18333	37983.5
17	GeC1-17	33	1968	7576	6.96392	52758.7	1.93333	14646.9
19	GeC1-19	37	1963	6088	7.80023	47487.8	1.18333	7204.13
21	GeC1-21	41	1959	4352	1.15876	5042.92	3.66667	15957.3
23	GeC1-23	45	1956	3808	0.257678	981.238	2.68333	10218.1
25	GeC1-25	49	1954	2800	0.512092	1433.86	0.966667	2706.67
27	GeC1-27	53	1952	3480	0.59959	2086.57	6.33333	22040
29	GeC1-29	57	1949	2408	0	0	9.23333	22233.9
31	GeC1-31	61	1947	2232	0.544444	1215.2	21.05	46983.6
33	GeC1-33	65	1944	1672	0.338863	566.578	11.3	18893.6
35	GeC1-35	69	1942	1896	0.413863	784.684	6.66667	12640
		depth of the core in cm	After dating, the core depth corresponds to a year	Total extracted DNA from the sediment core, expressed here as ng of DNA per gram of sediment	Quantification of tet(W). For the quantification, qPCRs were performed in triplicate and the mean value was used to calculate counts of tet(W) per ng of extracted DNA (total community DNA).	Quantification of tet(W). For the quantification, qPCRs were performed in triplicate and the mean value was used to calculate counts of tet(W) per gram of sediment	Quantification of sul1. For the quantification, qPCRs were performed in triplicate and the mean value was used to calculate counts of sul1 per ng of extracted DNA (total community DNA).	Quantification of sul1. For the quantification, qPCRs were performed in triplicate and the mean value was used to calculate counts of sul1 per gram of sediment

## Sheet: Fe_Mn_metadat
nb	sample_name	depth_cm	year	Mn Averge	Fe Average	Fe/Mn ratio
1	GeC1_01	1	2010	3695.4	142262	38.4972
2	GeC1_02	3	2007	3516.2	164053	46.6564
3	GeC1_03	5	2005	3509.2	161314	45.9689
4	GeC1_04	7	2002	3724.4	157811	42.3723
6	GeC1_06	11	1997	3622.6	142167	39.2444
7	GeC1_07	13	1994	3604.2	157699	43.7542
10	GeC1_10	19	1986	2037.4	104183	51.1352
14	GeC1_14	27	1976	2197.6	100179	45.5855
15	GeC1_15	29	1973	1889.8	69672.6	36.8677
16	GeC1_16	31	1970	1849.8	60893.2	32.9188
18	GeC1_18	35	1965	2268.8	87569.4	38.5972
19	GeC1_19	37	1963	2127.8	56326.2	26.4716
20	GeC1_20	39	1961	2827.4	108381	38.3323
21	GeC1_21	41	1959	3519.2	141853	40.3084
22	GeC1_22	43	1957	2593.6	76492	29.4926
24	GeC1_24	47	1955	3200.6	107515	33.5922
26	GeC1_26	51	1953	5516.6	156460	28.3617
27	GeC1_27	53	1952	4614	167291	36.2572
28	GeC1_28	55	1950	4192.4	152080	36.2751
30	GeC1_30	59	1948	4642.8	156468	33.7013
32	GeC1_32	63	1945	4137.4	149033	36.021
34	GeC1_34	67	1943	4955.4	143251	28.908
35	GeC1_35	69	1942	4611	156542	33.9497
36	GeC1_36	71	1941	4729.6	155937	32.9705
38	GeC1_38	75	1938	4367	134188	30.7278
40	GeC1_40	79	1936	4752.8	159016	33.4572
42	GeC1_42	83	1933	4580	175162	38.2449
44	GeC1_44	87	1931	4180.2	160333	38.3554
46	GeC1_46	91	1929	4198.6	150097	35.7493
48	GeC1_48	95	1926	3922.8	142028	36.2058
50	GeC1_50	99	1924	4384.2	152098	34.6923
52	GeC1_52	103	1921	4649.2	156448	33.6505
		depth of the core in cm	After dating, the core depth corresponds to a year	Mn content in sediment (in counts per second) measured by X-ray fluorescence analysis	Fe content in sediment (in counts per second) measured by X-ray fluorescence analysis	Ratio Fe/Mn in sediments
